# Supplementary material for: The design and implementation of natural population cohort study Biobank: A multiple-center project cooperation with medical consortia in Southwest China
Source: PubMed Central journal article supplement (PMC9751194; doi:10.3389/fpubh.2022.996169), 2022-12-01
Supplement: Data_Sheet_1.pdf [file Data_Sheet_1.pdf]

## *Supplementary Material*

### **1 Supplementary Tables**

**Supplementary Table 1. Guidelines for chronic diseases management in China**

| <b>Name</b>                                                                                   | <b>Time released</b> | <b>Affiliation</b>                                           |
|-----------------------------------------------------------------------------------------------|----------------------|--------------------------------------------------------------|
| Guidelines for Diagnosis and Treatment of Primary Liver Cancer in China                       | 2022                 | National Health Commission of the People's Republic of China |
| Guidelines for Clinical Diagnosis and Treatment of Lung cancer in China                       | 2022                 | Chinese Medical Association                                  |
| Guidelines for the Diagnosis and Management of Chronic Obstructive Pulmonary Disease in China | 2021                 | Chinese Medical Association                                  |
| Guidelines for Stroke Prevention and Treatment in China                                       | 2021                 | National Health Commission of the People's Republic of China |
| Precautionary Guidelines for Cardiovascular Diseases in China                                 | 2017                 | Chinese Medical Association                                  |

Supplementary Table 2. Exemplars of excellent international cohort studies and characteristic factors

| Cohort name                                            | Regions                  | Enroll start | Enrolled        | Age of participants | Questionnaire and/or interview | Physical measures | Bio specimens | Genomics data | Proteomics data | Metabolomics data | Environmental data | Data sharing | Years of follow up | Main research directions based on disease                            | References |
|--------------------------------------------------------|--------------------------|--------------|-----------------|---------------------|--------------------------------|-------------------|---------------|---------------|-----------------|-------------------|--------------------|--------------|--------------------|----------------------------------------------------------------------|------------|
| UK Biobank                                             | England, Scotland, Wales | 2006         | 500,000         | 40-69               | YES                            | YES               | YES           | YES           | YES             | YES               | YES                | YES          | /                  | Cancer, cardiovascular disease, stroke, diabetes, and dementia, etc. | [10]       |
| Framingham Heart Study (Original cohort)               | USA                      | 1948         | 5,209           | 28-74               | YES                            | YES               | YES           | <u>NO</u>     | <u>NO</u>       | <u>NO</u>         | YES                | YES          | 65                 | Cardiovascular disease                                               | [11-13]    |
| Framingham Heart Study (Offspring cohort)              |                          | 1971         | 5,124           | 5-70                | YES                            | YES               | YES           | YES           | YES             | YES               | YES                | YES          | 43                 |                                                                      |            |
| Framingham Heart Study (Omni Cohort)                   |                          | 1994         | 507             | 27-78               | YES                            | YES               | YES           | <u>NO</u>     | <u>NO</u>       | <u>NO</u>         | YES                | YES          | ≈15-20             |                                                                      |            |
| Framingham Heart Study (Third Generation cohort)       |                          | 2002         | 4,095           | 19-72               | YES                            | YES               | YES           | YES           | YES             | YES               | YES                | YES          | ≈10                |                                                                      |            |
| Framingham Heart Study (New offspring Spouse cohort)   |                          | 2003         | 103             | 47-85               | YES                            | YES               | YES           | <u>NO</u>     | <u>NO</u>       | <u>NO</u>         | YES                | YES          | ≈10                |                                                                      |            |
| Framingham Heart Study (Second generation omni cohort) |                          | 2003         | 410             | 20-80               | YES                            | YES               | YES           | <u>NO</u>     | <u>NO</u>       | <u>NO</u>         | YES                | YES          | ≈10                |                                                                      |            |
| Nurses' Health Study (NHS I)                           | USA                      | 1976         | 121700 (female) | 30-55               | YES                            | <u>NO</u>         | YES           | YES           | YES             | YES               | YES                | YES          | Lifetime           | Cancer, cardiovascular disease, postmenopausal                       | [14-16]    |

|                                                                    |                                                                                     |                   |                           |                |     |           |     |     |           |           |     |     |          |                                                                                                                          |         |
|--------------------------------------------------------------------|-------------------------------------------------------------------------------------|-------------------|---------------------------|----------------|-----|-----------|-----|-----|-----------|-----------|-----|-----|----------|--------------------------------------------------------------------------------------------------------------------------|---------|
| Nurses' Health Study (NHS II)                                      |                                                                                     | 1989              | 116000 (female)           | 25-42          | YES | <u>NO</u> | YES | YES | YES       | YES       | YES | YES | Lifetime | obesity, healthy aging, and psychosocial issues of aging, etc.                                                           |         |
| Nurses' Health Study (NHS III)                                     | USA, Canada                                                                         | 2010 (be rolling) | 100,000 (female and male) | 20-46          | YES | <u>NO</u> | YES | YES | YES       | YES       | YES | YES | Lifetime |                                                                                                                          |         |
| Canadian Longitudinal Study on Aging                               | Canada                                                                              | 2010              | 50,000                    | 45-85          | YES | YES       | YES | YES | YES       | YES       | YES | YES | >18      | Healthy aging                                                                                                            | [17]    |
| Lifelines                                                          | Netherlands                                                                         | 2006              | 167,000                   | 0-65+          | YES | YES       | YES | YES | <u>NO</u> | <u>NO</u> | YES | YES | >30      | Healthy aging                                                                                                            | [18-20] |
| European Prospective Investigation into Cancer and Nutrition study | France, Germany, Greece, Italy, Netherlands, Spain, UK, Sweden, Denmark, and Norway | 1992              | 521,000                   | 35-70 (mostly) | YES | YES       | YES | YES | YES       | YES       | YES | YES | ≈15      | Cancer, cardiovascular disease, type 2 diabetes, mortality, and healthy ageing                                           | [21-22] |
| German National Cohort                                             | Germany                                                                             | 2014              | 200,000                   | 20-69          | YES | YES       | YES | YES | YES       | YES       | YES | YES | 25-30    | Cancer, cardiovascular disease, diabetes, nervous system, rheumatic, or degrading diseases of the musculoskeletal system | [23]    |

Supplementary Material

|                                                                                 |                          |      |         |       |     |     |     |     |           |           |     |     |          |                                                                                        |      |
|---------------------------------------------------------------------------------|--------------------------|------|---------|-------|-----|-----|-----|-----|-----------|-----------|-----|-----|----------|----------------------------------------------------------------------------------------|------|
| Japan Public Health Center-based Prospective Study                              | Japan                    | 1990 | 140,420 | 40-69 | YES | YES | YES | YES | /         | /         | YES | YES | Lifetime | Cancer, myocardial infarction, stroke, etc.                                            | [24] |
| Korean Genome and Epidemiology Study (Ansan and Ansung study)                   | Korea                    | 2001 | 10,030  | 40-69 | YES | YES | YES | YES | <u>NO</u> | <u>NO</u> | YES | YES | 17       | Cardiovascular disease, type 2 diabetes, hypertension, metabolic syndrome, and obesity | [25] |
| Korean Genome and Epidemiology Study (cardiovascular disease association study) |                          | 2004 | 28,338  | >40   | YES | YES | YES | YES | <u>NO</u> | <u>NO</u> | YES | YES | 10       |                                                                                        |      |
| Korean Genome and Epidemiology Study (health examinees study)                   |                          | 2004 | 173,343 | >40   | YES | YES | YES | YES | <u>NO</u> | <u>NO</u> | YES | YES | 10       |                                                                                        |      |
| Korean Genome and Epidemiology Study (twin and family study)                    |                          | 2005 | 3,202   | /     | YES | YES | YES | YES | <u>NO</u> | <u>NO</u> | YES | YES | 7        |                                                                                        |      |
| Korean Genome and Epidemiology Study (emigrant study)                           | Japan, China             | 2005 | 3,563   | /     | YES | YES | YES | YES | <u>NO</u> | <u>NO</u> | YES | YES | 6        |                                                                                        |      |
| Korean Genome and Epidemiology Study (immigrant study)                          | Korea, Vietnam, Cambodia | 2006 | 11,245  | /     | YES | YES | YES | YES | <u>NO</u> | <u>NO</u> | YES | YES | 3        |                                                                                        |      |

**Supplementary Table 3. Questionnaire used in baseline survey**

Name \_\_\_\_\_ ID \_\_\_\_\_ Date \_\_\_\_\_ Age \_\_\_\_\_

*Part 1: Basic Information*

| No. | Item                                                            | Response option                                                                                                                                                                                                                                                                                                                   | Your answer |
|-----|-----------------------------------------------------------------|-----------------------------------------------------------------------------------------------------------------------------------------------------------------------------------------------------------------------------------------------------------------------------------------------------------------------------------|-------------|
| A1  | Degree of Education                                             | 1- Elementary school and below<br>2- Junior high school<br>3- Senior high school or Vocational high school<br>4- Junior or undergraduate college<br>5- Master degree or above                                                                                                                                                     |             |
| A2  | Marital Status                                                  | 1- Married or cohabiting<br>2- Unmarried<br>3- Divorced<br>4- Separated<br>5- Widowed                                                                                                                                                                                                                                             |             |
| A3  | Participated Medical insurance                                  | 1- Uninsured<br>2- Basic medical insurance system for urban workers<br>3- Basic medical insurance system for non-working urban residents<br>4- New type of rural cooperative medical care system<br>5- Cooperative medical insurance for urban and rural residents<br>6- Commercial insurance<br>7- Unclear<br>8- Other insurance |             |
| A4  | Is it equal or more than five years since your house was built? | 1- Yes, and resided for more than one year<br>2- Yes, and resided for less than one year<br>3- No                                                                                                                                                                                                                                 |             |
| A5  | Were you born prematurely?                                      | 1- Yes<br>2- No<br>3- Unclear                                                                                                                                                                                                                                                                                                     |             |
| A6  | Are you twins or multiples?                                     | 1- No<br>2- Identical twins<br>3- Fraternal twins<br>4- Multiple births                                                                                                                                                                                                                                                           |             |

|    |                                                                                                                                                              |                                                                                                                            |
|----|--------------------------------------------------------------------------------------------------------------------------------------------------------------|----------------------------------------------------------------------------------------------------------------------------|
| A7 | Is there any consanguineous marriage among your close relatives within four generations (you, your parents, your grandparents, and your great-grandparents)? | 1- Yes<br>2- No<br>3- Unclear                                                                                              |
| A8 | Did your biological parents raise you?                                                                                                                       | 1- Yes<br>2- No                                                                                                            |
| A9 | Did your parents have any of the following negative events before you turned 17?                                                                             | 1- Divorced<br>2- Pass away<br>3- Alcoholism<br>4- Drug<br>5- Traffic accident<br>6- Crime<br>7- Lay ill in bed<br>8- None |

***Part 2: Life-Style Behavior***

| No. | Item                                 | Response option                                                                                                                                                                                                                                                                                                                                                                                                                                                                      | Your answer |
|-----|--------------------------------------|--------------------------------------------------------------------------------------------------------------------------------------------------------------------------------------------------------------------------------------------------------------------------------------------------------------------------------------------------------------------------------------------------------------------------------------------------------------------------------------|-------------|
| B1  | Have you been screened for COVID-19? | 1- Yes<br>2- No                                                                                                                                                                                                                                                                                                                                                                                                                                                                      |             |
| B2  | Career                               | 1- Principal of state agencies/party-masses/enterprise/project units<br>2- Professional/technical personnel<br>3- Clerk<br>4- Commercial/service personnel<br>5- Production personnel of agriculture/forestry/animal husbandry/fishery/water conservancy industry<br>6- Production and transportation equipment operators/related personnel<br>7- Soldier<br>8- Student (Jump to B11)<br>9- Laid-off/retired personnel (Jump to B11)<br>10- Unemployed (Jump to B11)<br>11- Other(s) |             |

|     |                                                                         |                                                                                                                                        |           |
|-----|-------------------------------------------------------------------------|----------------------------------------------------------------------------------------------------------------------------------------|-----------|
| B3  | What kind of transportation do you take when you go out?                | 1- Public traffic<br>2- Private Cars<br>3- Motorcycle or electric cars<br>4- Bicycle<br>5- Pedestrian<br>6- Telecommuting (Jump to B5) |           |
| B4  | How far are you from the company?                                       |                                                                                                                                        | _____ km  |
| B5  | How long do you work per week on average?                               |                                                                                                                                        | _____ day |
| B6  | How long do you work per day on average?                                |                                                                                                                                        | _____ h   |
| B7  | How about the work intensity?                                           | 1- Low<br>2- Moderate<br>3- High                                                                                                       |           |
| B8  | Main types of work                                                      | 1- Mental labor<br>2- Manual work<br>3- Both                                                                                           |           |
| B9  | Do you spend long periods of time sitting/standing at daily work?       | 1- Long-term standing<br>2- Long-term sitting/sedentary, for _____ h<br>3- Neither<br>4- Both                                          |           |
| B10 | How long is your sedentary time in free hours every weekday on average? |                                                                                                                                        | _____ h   |
| B11 | How long is your sedentary time on every rest day on average?           |                                                                                                                                        | _____ h   |
| B12 | How did you go upstairs/downstairs?                                     | 1- Walking<br>2- Elevator<br>3- Combination of walking and elevator<br>4- No need to go upstairs/downstairs                            |           |

|     |                                                                                           |                                                                                                                                                                                           |
|-----|-------------------------------------------------------------------------------------------|-------------------------------------------------------------------------------------------------------------------------------------------------------------------------------------------|
| B13 | In the past 6 months, what physical activity have you participated in?                    | 1- None (Jump to B16)<br>2- Jogging<br>3- Walking<br>4- Stroll<br>5- Gymnasium<br>6- Yoga<br>7- Swimming<br>8- Aerobics<br>9- Ball game<br>10- Bicycle ride<br>11- Other exercise(s)_____ |
| B14 | In the past 6 months, how many times a week have you participated in the above exercises? | 1- Less than once a week<br>2- Once or twice a week<br>3- 3 to 5 times a week<br>4- 6 or more times a week                                                                                |
| B15 | How long does each exercise last on average?                                              | Number of minutes_____                                                                                                                                                                    |
| B16 | How often do you cook at home?                                                            | 1- Every day/Nearly every day<br>2- Not at all/Seldom (Jump to B19)<br>3- _____times a week on average                                                                                    |
| B17 | What is the main fuel used for cooking?                                                   | 1- Gas<br>2- Electricity<br>3- Coal<br>4- Firewood<br>5- Other fuel(s)_____                                                                                                               |
| B18 | How often do you use a fume extractor for cooking at home?                                | 1- Always<br>2- Seldom<br>3- Never                                                                                                                                                        |
| B19 | What was your smoking status in the last six months?                                      | 1- Smoking<br>2- Occasional smoking<br>3- Not smoking (Jump to B24)<br>4- Quit smoking (Jump to B22)                                                                                      |
| B20 | When did you start smoking?                                                               | ____(age)                                                                                                                                                                                 |
| B21 | How many cigarettes did you smoke on average per day in the last week?                    | 1- _____(quantity of cigarettes)<br>2- Zero                                                                                                                                               |



|     |                                                       |                                                                                                            |
|-----|-------------------------------------------------------|------------------------------------------------------------------------------------------------------------|
| B22 | When did you quit smoking?                            | _____ (age)                                                                                                |
| B23 | The main reason for quitting smoking?                 | 1- Morbid or sub-health state<br>2- Disease prevention<br>3- Economic aspects<br>4- Other reason(s) _____  |
| B24 | Are you exposed to passive smoking?                   | 1- No (Jump to B27)<br>2- 1 or 2 times per week<br>3- 3 to 5 times per week<br>4- 5 or more times per week |
| B25 | Average time of the exposure to passive smoking       | 1- 15-29 min<br>2- 30-59 min<br>3- $\geq$ 60 min                                                           |
| B26 | Do family members or roommates living with you smoke? | 1- No<br>2- Parents<br>3- Grandparents<br>4- Spouse<br>5- Offspring<br>6- Roommate<br>7- Other(s) _____    |
| B27 | Did you ever drink alcohol?                           | 1- Yes<br>2- No (Jump to B33)<br>3- Quit (Jump to B32)                                                     |
| B28 | When did you start drinking?                          | _____ (age)                                                                                                |

**The following questions are about the past year**

|     |                                                                                        |                                                                                                      |
|-----|----------------------------------------------------------------------------------------|------------------------------------------------------------------------------------------------------|
| B29 | How often do you have a drink containing alcohol?                                      | 1- Monthly or less<br>2- 2 to 4 times a month<br>3- 2 to 3 times a week<br>4- 4 or more times a week |
| B30 | How many drinks containing alcohol do you have on a typical day when you are drinking? | 1- 1 or 2<br>2- 3 or 4<br>3- 5 or 6<br>4- 7 or 9<br>5- 10 or more                                    |

---

|     |                                                           |                                                                             |
|-----|-----------------------------------------------------------|-----------------------------------------------------------------------------|
| B31 | How often do you have six or more drinks on one occasion? | 1- Less than monthly<br>2- Monthly<br>3- Weekly<br>4- Daily or almost daily |
|-----|-----------------------------------------------------------|-----------------------------------------------------------------------------|

---

|     |                             |             |
|-----|-----------------------------|-------------|
| B32 | When did you quit drinking? | _____ (age) |
|-----|-----------------------------|-------------|

---

### Pittsburgh Sleep Quality Index (PSQI)

---

|     |                                                                    |                 |
|-----|--------------------------------------------------------------------|-----------------|
| B33 | During the past month, when have you usually gone to bed at night? | Usual bedtime__ |
|-----|--------------------------------------------------------------------|-----------------|

---

|     |                                                                                                 |                        |
|-----|-------------------------------------------------------------------------------------------------|------------------------|
| B34 | During the past month, how long (in minutes) has it usually take you to fall asleep each night? | Number of Minutes_____ |
|-----|-------------------------------------------------------------------------------------------------|------------------------|

---

|     |                                                                        |                            |
|-----|------------------------------------------------------------------------|----------------------------|
| B35 | During the past month, when have you usually gotten up in the morning? | Usual getting up time_____ |
|-----|------------------------------------------------------------------------|----------------------------|

---

|     |                                                                                                                                               |                               |
|-----|-----------------------------------------------------------------------------------------------------------------------------------------------|-------------------------------|
| B36 | During the past month, how many hours of actual sleep did you get at night (This may be different than the number of hours you spend in bed)? | Hours of sleep per night_____ |
|-----|-----------------------------------------------------------------------------------------------------------------------------------------------|-------------------------------|

---

### During the past month, how often have you had trouble sleeping because you...

---

|     |                                       |                                                                                                                      |
|-----|---------------------------------------|----------------------------------------------------------------------------------------------------------------------|
| B37 | Cannot get to sleep within 30 minutes | 1- Not during the last month<br>2- Less than once a week<br>3- Once or twice a week<br>4- Three or more times a week |
|-----|---------------------------------------|----------------------------------------------------------------------------------------------------------------------|

---

|     |                                                     |                                                                                                                      |
|-----|-----------------------------------------------------|----------------------------------------------------------------------------------------------------------------------|
| B38 | Wake up in the middle of the night or early morning | 1- Not during the last month<br>2- Less than once a week<br>3- Once or twice a week<br>4- Three or more times a week |
|-----|-----------------------------------------------------|----------------------------------------------------------------------------------------------------------------------|

---

|     |                                    |                                                                                                                      |
|-----|------------------------------------|----------------------------------------------------------------------------------------------------------------------|
| B39 | Have to get up to use the bathroom | 1- Not during the last month<br>2- Less than once a week<br>3- Once or twice a week<br>4- Three or more times a week |
|-----|------------------------------------|----------------------------------------------------------------------------------------------------------------------|

---

|     |                                                                                                                                  |                                                                                                                      |
|-----|----------------------------------------------------------------------------------------------------------------------------------|----------------------------------------------------------------------------------------------------------------------|
| B40 | Cannot breathe comfortably                                                                                                       | 1- Not during the last month<br>2- Less than once a week<br>3- Once or twice a week<br>4- Three or more times a week |
| B41 | Cough or snore loudly                                                                                                            | 1- Not during the last month<br>2- Less than once a week<br>3- Once or twice a week<br>4- Three or more times a week |
| B42 | Feel too cold                                                                                                                    | 1- Not during the last month<br>2- Less than once a week<br>3- Once or twice a week<br>4- Three or more times a week |
| B43 | Feel too hot                                                                                                                     | 1- Not during the last month<br>2- Less than once a week<br>3- Once or twice a week<br>4- Three or more times a week |
| B44 | Had bad dreams                                                                                                                   | 1- Not during the last month<br>2- Less than once a week<br>3- Once or twice a week<br>4- Three or more times a week |
| B45 | Have pain                                                                                                                        | 1- Not during the last month<br>2- Less than once a week<br>3- Once or twice a week<br>4- Three or more times a week |
| B46 | Other reason(s), please describe_____                                                                                            | 1- Not during the last month<br>2- Less than once a week<br>3- Once or twice a week<br>4- Three or more times a week |
| B47 | During the past month, how would you rate your sleep quality overall?                                                            | 1- Superior/Very good<br>2- General/Fairly good<br>3- Inferior/Fairly bad<br>4- Poor/Very bad                        |
| B48 | During the past month, how often have you taken medicine (prescribed or “over the counter”) to help you sleep?                   | 1- Not during the last month<br>2- Less than once a week<br>3- Once or twice a week<br>4- Three or more times a week |
| B49 | During the past month, how often have you had trouble staying awake while driving, eating meals, or engaging in social activity? | 1- Not during the last month<br>2- Less than once a week<br>3- Once or twice a week<br>4- Three or more times a week |

|     |                                                                                                                   |                                                                                                                      |
|-----|-------------------------------------------------------------------------------------------------------------------|----------------------------------------------------------------------------------------------------------------------|
| B50 | During the past month, how much of a problem has it been for you to keep up enough enthusiasm to get things done? | 1- Not during the last month<br>2- Less than once a week<br>3- Once or twice a week<br>4- Three or more times a week |
|-----|-------------------------------------------------------------------------------------------------------------------|----------------------------------------------------------------------------------------------------------------------|

***Part 3: Sign and Symptom***

| No. | Item                                                                                              | Response option                                                                                                                                                  | Your answer |
|-----|---------------------------------------------------------------------------------------------------|------------------------------------------------------------------------------------------------------------------------------------------------------------------|-------------|
| C1  | During the two months, has your weight dropped significantly?                                     | 1- Yes<br>2- No (Jump to C3)                                                                                                                                     |             |
| C2  | Weight loss                                                                                       |                                                                                                                                                                  | _____kg     |
| C3  | Do you have the following symptoms?                                                               | 1- Pant<br>2- Dyspnea<br>3- Hoarseness<br>4- Dysphagia<br>5- Chest tightness<br>6- None                                                                          |             |
| C4  | Do you have the history of occupational exposure to radon, asbestos, arsenic, dust and lampblack? | 1- Radon, for _____ years<br>2- Asbestos, for _____ years<br>3- Arsenic, for _____ years<br>4- Dust, for _____ years<br>5- Lampblack, for _____ years<br>6- None |             |
| C5  | Have you been diagnosed with intrathoracic sarcoidosis by your doctor before?                     | 1- Yes, pulmonary nodules were first detected at _____<br>2- No (Jump to C7)                                                                                     |             |
| C6  | Pulmonary nodules were first detected by                                                          | 1- Health examination<br>2- Clinical examination                                                                                                                 |             |
| C7  | Have you been diagnosed COPD by your doctor?                                                      | 1- Yes, _____ (age at diagnosis)<br>2- No<br>3- Unclear                                                                                                          |             |
| C8  | Do you currently take more than five medications orally?                                          | 1- Yes<br>2- No                                                                                                                                                  |             |

|     |                                                                                        |                                                                                                                                                                                                                                                                                                                                                                                                       |
|-----|----------------------------------------------------------------------------------------|-------------------------------------------------------------------------------------------------------------------------------------------------------------------------------------------------------------------------------------------------------------------------------------------------------------------------------------------------------------------------------------------------------|
| C9  | Do you have frequent dental ulcers?                                                    | 1- Yes<br>2- No                                                                                                                                                                                                                                                                                                                                                                                       |
| C10 | Are you allergic to sunlight?                                                          | 1- Yes<br>2- No                                                                                                                                                                                                                                                                                                                                                                                       |
| C11 | Does your skin appear pale and bruised after exposure to cold?                         | 1- Yes<br>2- No                                                                                                                                                                                                                                                                                                                                                                                       |
| C12 | Do you have joint pain?                                                                | 1- No<br>2- Distal interphalangeal joint<br>3- Proximal interphalangeal joint<br>4- Metacarpophalangeal joint<br>5- Wrist joints<br>6- Elbow joint<br>7- Shoulder joint<br>8- Temporo-mandibular Joint<br>9- Hip joint<br>10- Knee joint<br>11- Ankle joint<br>12- Metatarsophalangeal joint<br>13- Sternoclavicular joint<br>14- Sacroiliac joint<br>15- Calcaneal-talar joint<br>16- Other(s) _____ |
| C13 | During the past month, have you had repetitive knee joint pain?                        | 1- Yes<br>2- No                                                                                                                                                                                                                                                                                                                                                                                       |
| C14 | Does the knee joint produce bone crepitus when moving?                                 | 1- Yes<br>2- No                                                                                                                                                                                                                                                                                                                                                                                       |
| C15 | Have you ever had a knee injury?                                                       | 1- Yes<br>2- No                                                                                                                                                                                                                                                                                                                                                                                       |
| C16 | During the past year, have you repeatedly experienced one of the following situations? | 1- No<br>2- Joint pain appeared in both hands, which is worst in the morning with stiffness ( $\geq 30$ min) and gets better with activity<br>3- Morning stiffness ( $<30$ min) in knee                                                                                                                                                                                                               |
| C17 | Have you been diagnosed with migraine by your doctor before?                           | 1- Yes<br>2- No                                                                                                                                                                                                                                                                                                                                                                                       |

|     |                                                                                                                      |                                                                                                                                                                                                                             |
|-----|----------------------------------------------------------------------------------------------------------------------|-----------------------------------------------------------------------------------------------------------------------------------------------------------------------------------------------------------------------------|
| C18 | Do you had headaches when you're young (at age of 10-50), and which limit your ability to work, study or enjoy life? | 1- Yes<br>2- No                                                                                                                                                                                                             |
| C19 | Do you feel nauseated or sick to your stomach with headaches?                                                        | 1- Yes<br>2- No                                                                                                                                                                                                             |
| C20 | Does the light bother you?                                                                                           | 1- Yes<br>2- No                                                                                                                                                                                                             |
| C21 | Have you been diagnosed with Parkinson's disease (PD) by your doctor?                                                | 1- Yes, _____(age at diagnosis), _____(hospital)<br>2- No (Jump to C23)                                                                                                                                                     |
| C22 | What type of medications are you taking currently?                                                                   | 1- No-drug treatment<br>2- Unclear<br>3- Madopar<br>4- Pramipexole<br>5- Entacapone<br>6- Trihexyphenidyl<br>7- Amantadine<br>8- Sinemet<br>9- Trastal<br>10- Eldepryl<br>11- Rasagiline Mesylate Tablets<br>12- Vitamin B6 |
| C23 | Have you been diagnosed with cerebral infarction by your doctor?                                                     | 1- Yes, _____(age at diagnosis), _____(hospital)<br>2- No (Jump to C25)                                                                                                                                                     |
| C24 | What type of medications are you taking currently?                                                                   | 1- No-drug treatment<br>2- Unclear<br>3- Aspirin<br>4- Clopidogrel<br>5- Warfarin<br>6- Pradaxa<br>7- Rivaroxaban<br>8- Atorvastatin<br>9- Simvastatin                                                                      |
| C25 | Have you been diagnosed with cerebral hemorrhage by your doctor?                                                     | 1- Yes, _____(age at diagnosis), _____(hospital)<br>2- No (Jump to C27)                                                                                                                                                     |

|     |                                                                           |                                                                                                                                                                                                                                                                                                                                                              |
|-----|---------------------------------------------------------------------------|--------------------------------------------------------------------------------------------------------------------------------------------------------------------------------------------------------------------------------------------------------------------------------------------------------------------------------------------------------------|
| C26 | What type of medications are you taking currently?                        | <ul style="list-style-type: none"> <li>1- No-drug treatment</li> <li>2- Unclear</li> <li>3- Aspirin</li> <li>4- Clopidogrel</li> <li>5- Warfarin</li> <li>6- Pradaxa</li> <li>7- Rivaroxaban</li> <li>8- Atorvastatin</li> <li>9- Simvastatin</li> </ul>                                                                                                     |
| C27 | Have you been diagnosed with epilepsy by your doctor?                     | <ul style="list-style-type: none"> <li>1- Yes, _____(age at diagnosis), _____(hospital)</li> <li>2- No (Jump to C29)</li> </ul>                                                                                                                                                                                                                              |
| C28 | What type of medications are you taking currently?                        | <ul style="list-style-type: none"> <li>1- No-drug treatment</li> <li>2- Unclear</li> <li>3- Sodium valproate</li> <li>4- Levetiracetam</li> <li>5- Topiramate</li> <li>6- Carbamazepine</li> <li>7- Oxcarbazepine</li> <li>8- Lamotrigine</li> <li>9- Phenytoin sodium</li> <li>10- Phenobarbital</li> <li>11- Clonazepam</li> <li>12- Lacosamide</li> </ul> |
| C29 | Have you been diagnosed with other neurological disorders by your doctor? | <ul style="list-style-type: none"> <li>1- Yes, _____(age at diagnosis), _____(hospital)</li> <li>2- No (Jump to C31)</li> </ul>                                                                                                                                                                                                                              |
| C30 | Have you taken any medicine?                                              | <ul style="list-style-type: none"> <li>1- Yes, _____(drug name)</li> <li>2- No</li> </ul>                                                                                                                                                                                                                                                                    |
| C31 | Have you been diagnosed with lithiasis by your doctor?                    | <ul style="list-style-type: none"> <li>1- No</li> <li>2- Unclear</li> <li>3- Lithiasis in urinary system</li> <li>4- Hepatobiliary lithiasis</li> <li>5- Other(s) _____</li> </ul>                                                                                                                                                                           |
| C32 | During the past year, have you ever leaked urine involuntarily?           | <ul style="list-style-type: none"> <li>1- Yes</li> <li>2- No</li> <li>3- Refuse to answer</li> <li>4- Unclear</li> </ul>                                                                                                                                                                                                                                     |

|     |                                                                                    |                                                                                                                                                        |
|-----|------------------------------------------------------------------------------------|--------------------------------------------------------------------------------------------------------------------------------------------------------|
| C33 | How many times do you get up to urinate at night from falling asleep to waking up? | 1- Yes, _____ times per night<br>2- No<br>3- Refuse to answer<br>4- Unclear                                                                            |
| C34 | During the past year, have you been able to urinate smoothly (male only)?          | 1- Yes<br>2- No<br>3- Refuse to answer<br>4- Unclear                                                                                                   |
| C35 | How many times do you defecate in a day?                                           | 1- Less than once a day<br>2- Once a day<br>3- Twice a day<br>4- More than twice a day                                                                 |
| C36 | When do you usually defecate?                                                      | 1- Morning<br>2- Forenoon<br>3- None<br>4- Afternoon<br>5- Night<br>6- Random                                                                          |
| C37 | Have you been diagnosed with hypertension by your doctor?                          | 1- Yes, _____(age at diagnosis), _____(hospital)<br>2- No                                                                                              |
| C38 | Have you been diagnosed with hyperglycemia by your doctor?                         | 1- No<br>2- Diabetes mellitus, _____(age at diagnosis)<br>3- Prediabetes, _____(age at diagnosis)<br>4- Unknown/other type(s), _____(age at diagnosis) |
| C39 | Have you been diagnosed with a tumor by your doctor?                               | 1- No (Jump to C41)<br>2- Benign<br>3- Malignant<br>4- Both benign and malignant<br>5- Unclear                                                         |



|     |                                                                                                                    |                                                                                                                                                                                                                                                                                                                                                                                                                                                                                                                                                                                                                                                        |
|-----|--------------------------------------------------------------------------------------------------------------------|--------------------------------------------------------------------------------------------------------------------------------------------------------------------------------------------------------------------------------------------------------------------------------------------------------------------------------------------------------------------------------------------------------------------------------------------------------------------------------------------------------------------------------------------------------------------------------------------------------------------------------------------------------|
| C40 | Please select your specific tumor type                                                                             | <hr/> 1- Breast cancer<br>2- Lung cancer<br>3- Ovarian cancer<br>4- Metrocarcinoma<br>5- Brain tumor<br>6- Gastric carcinoma<br>7- Liver cancer<br>8- Colorectal cancer<br>9- Esophagus cancer<br>10- Bladder cancer<br>11- Pancreatic cancer<br>12- Hysteromyoma<br>13- Hepatic cyst<br>14- Prostatic cancer<br>15- Ovarian cyst<br>16- Other tumor type(s), _____                                                                                                                                                                                                                                                                                    |
| C41 | Have you been diagnosed with the following diseases by your doctor (thyroid-associated diseases are not included)? | <hr/> 1- No<br>2- CHD (myocardial infarction/angina)<br>3- Systemic lupus erythematosus<br>4- Osteoporosis<br>5- Kidney-related diseases<br>6- Depression<br>7- Schizophrenia<br>8- Hyperlipidemia<br>9- Pulmonary heart disease<br>10- Chronic heart failure<br>11- Chronic hepatitis virus<br>12- Fatty liver disease<br>13- Liver cirrhosis<br>14- Gout and hyperuricemia<br>15- Interstitial pneumonia<br>16- Chronic bronchitis<br>17- Emphysema<br>18- Asthma<br>19- Tuberculosis<br>20- Pneumoconiosis<br>21- Rheumatoid Arthritis<br>22- Knee osteoarthritis<br>23- Diabetic retinopathy<br>24- diabetic foot<br>25- Diabetic foot amputations |

|     |                                                                                                                                        |                                                                                                                                                                                                                                                                                                                                                                                                                                                                                                                                 |
|-----|----------------------------------------------------------------------------------------------------------------------------------------|---------------------------------------------------------------------------------------------------------------------------------------------------------------------------------------------------------------------------------------------------------------------------------------------------------------------------------------------------------------------------------------------------------------------------------------------------------------------------------------------------------------------------------|
|     |                                                                                                                                        | 26- Diabetic blindness<br>27- History of benign breast disease<br>28- Coronary heart disease<br>29- Heart failure<br>30- Artery disease (arteriosclerosis/plaque/arteriostenosis)<br>31- Atrial fibrillation<br>32- Brain trauma<br>33- Viral encephalitis<br>34- Benign prostatic hyperplasia<br>35- Acute pancreatitis<br>36- Other pancreatic diseases<br>37- Scleroderma<br>38- Dermatomyositis<br>39- Sicca syndrome<br>40- Gastric ulcer<br>41- Functional dyspepsia<br>42- Cholangiectasis<br>43- Other disease(s),_____ |
| C42 | Have you had any type of surgery?                                                                                                      | 1- Yes<br>2- No (Jump to C46)                                                                                                                                                                                                                                                                                                                                                                                                                                                                                                   |
| C43 | How old were you when you had your first operation?                                                                                    | ____(age)                                                                                                                                                                                                                                                                                                                                                                                                                                                                                                                       |
| C44 | What is the reason for your operation?                                                                                                 | ____(reason)                                                                                                                                                                                                                                                                                                                                                                                                                                                                                                                    |
| C45 | What is your type of surgery?                                                                                                          | 1- Open Surgery<br>2- Minimally invasive surgery<br>3- Other type(s)_____                                                                                                                                                                                                                                                                                                                                                                                                                                                       |
| C46 | Have you ever had a fracture?                                                                                                          | 1- Yes<br>2- No (Jump to C49)                                                                                                                                                                                                                                                                                                                                                                                                                                                                                                   |
| C47 | Did your fracture occur in a violent situation (road accident injury /drifting-down injury/bruise injury caused by heavy object etc.)? | 1- Yes<br>2- No                                                                                                                                                                                                                                                                                                                                                                                                                                                                                                                 |

|     |                                                                                                                                                     |                                                                                                                                                                                                                                                                                                                                                                                                                                                                                                                                                                                                                                                                                            |
|-----|-----------------------------------------------------------------------------------------------------------------------------------------------------|--------------------------------------------------------------------------------------------------------------------------------------------------------------------------------------------------------------------------------------------------------------------------------------------------------------------------------------------------------------------------------------------------------------------------------------------------------------------------------------------------------------------------------------------------------------------------------------------------------------------------------------------------------------------------------------------|
| C48 | Where is your fracture location?                                                                                                                    | 1- Spine<br>2- Hip/Femur<br>3- Forearm<br>4- Upper arm<br>5- Pelvis<br>6- Ankle<br>7- Rib<br>8- Other body part(s),_____                                                                                                                                                                                                                                                                                                                                                                                                                                                                                                                                                                   |
| C49 | Have you been diagnosed with thyroid diseases by your doctor?                                                                                       | 1- Hyperthyroidism<br>2- Hypothyroidism<br>3- Graves disease<br>4- Hashimoto's thyroiditis<br>5- Thyroid tumor<br>6- Thyroid nodule<br>7- No                                                                                                                                                                                                                                                                                                                                                                                                                                                                                                                                               |
| C50 | Have your direct lineal consanguinity in blood and full siblings within three generations been diagnosed with the following diseases by the doctor? | 1- No<br>2- Unclear<br>3- Diabetes mellitus<br>4- Hyperlipidemia<br>5- Hypertension<br>6- Lung cancer<br>7- Prostatic cancer<br>8- Other malignant tumor(s)<br>9- Hyperthyroidism<br>10- Hypothyroidism<br>11- Graves disease<br>12- Hashimoto's thyroiditis<br>13- Pancreatitis<br>14- Knee Arthritis<br>15- Ankylosing Spondylitis<br>16- Systemic Lupus Erythematosus<br>17- Rheumatoid arthritis<br>18- Scleroderma<br>19- Dermatomyositis<br>20- Sicca syndrome<br>21- Polycystic kidney disease<br>22- Familial hypercholesterolemia<br>23- Hypertrophic cardiomyopathy<br>24- Dilated cardiomyopathy<br>25- Arrhythmogenic Right Ventricular Cardiomyopathy<br>26- Long QT syndrome |

- 
- 27- Catecholaminergic polymorphic ventricular tachycardia
  - 28- Brugada syndrome
  - 29- Marfan syndrome
  - 30- Liddle's syndrome
  - 31- Familial Aldosteronism
  - 32- Glucocorticoid-remediable aldosteronism
- 

---

***Part 4: Female Relevant Information (Female only)***

---

| No. | Item                                                            | Response option                                                                                                                                                          | Your answer |
|-----|-----------------------------------------------------------------|--------------------------------------------------------------------------------------------------------------------------------------------------------------------------|-------------|
| D1  | When did you first have a period?                               | 1- First menstruation, _____(age)<br>2- No menstruation (Jump to D3), because of _____                                                                                   |             |
| D2  | How long does your period last?                                 | 1- < 3 days<br>2- 3-7 days<br>3- > 7 days<br>4- Irregular                                                                                                                |             |
| D3  | How many children have you had?                                 | 1- None (Jump to D6)<br>2- One<br>3- $\geq$ Two, _____(specific number)                                                                                                  |             |
| D4  | When did you have your first child?                             |                                                                                                                                                                          | ____(age)   |
| D5  | How long have you been breast-feeding?                          | 1- 1-6 months<br>2- 7-12 months<br>3- 13-24 months<br>4- > 24 months<br>5- Not breast-feeding                                                                            |             |
| D6  | Have you been diagnosed with pregnancy diseases by your doctor? | 1- No<br>2- Gestational hypertension<br>3- Eclampsia<br>4- Gestational diabetes mellitus<br>5- Hyperthyroidism/hypothyroidism in pregnancy<br>6- Other disease(s), _____ |             |

|     |                                                      |                                                                                                                                                      |
|-----|------------------------------------------------------|------------------------------------------------------------------------------------------------------------------------------------------------------|
| D7  | Have you ever had an abortion?                       | 1- No<br>2- Pathologic labor, _____(abortion times)<br>3- Family planning policy, _____(abortion times)<br>4- Other reason(s), _____(abortion times) |
| D8  | Have you had three or more unexplained miscarriages? | 1- Yes<br>2- No                                                                                                                                      |
| D9  | Are you menopausal?                                  | 1- Premenopause (Jump to E1)<br>2- Perimenopause (Jump to E1)<br>3- Postmenopause                                                                    |
| D10 | When did you go through menopause?                   | ____(age)                                                                                                                                            |
| D11 | Did you go through menopause naturally?              | 1- Yes<br>2- No                                                                                                                                      |

***Part 5: Diet***

| No. | Item                                       | Response option                                                                                                                                                   | Your answer |
|-----|--------------------------------------------|-------------------------------------------------------------------------------------------------------------------------------------------------------------------|-------------|
| E1  | Are you living alone?                      | 1- Yes<br>2- No                                                                                                                                                   |             |
| E2  | Are you eating alone?                      | 1- Yes<br>2- No, _____(specific number)                                                                                                                           |             |
| E3  | What type of drinking water do you prefer? | 1- Tap water<br>2- Bottled water<br>3- Well water<br>4- Purified water<br>5- Pure water<br>6- Bottled Mineral Water<br>7- Spring Water<br>8- Other type(s), _____ |             |

|     |                                                            |                                                                                                                                                                                                                                                                                              |
|-----|------------------------------------------------------------|----------------------------------------------------------------------------------------------------------------------------------------------------------------------------------------------------------------------------------------------------------------------------------------------|
| E4  | What kind of oil do you prefer?                            | <ul style="list-style-type: none"> <li>1- Canola oil</li> <li>2- Soybean oil</li> <li>3- Peanut oil</li> <li>4- Olive oil</li> <li>5- Corn oil</li> <li>6- Sesame oil</li> <li>7- Animal oil</li> <li>8- Other type(s), _____</li> </ul>                                                     |
| E5  | What is the taste preference of your daily diet?           | <ul style="list-style-type: none"> <li>1- Greasy</li> <li>2- Spicy</li> <li>3- Salty</li> <li>4- Light</li> <li>5- Sweet</li> <li>6- Hot</li> <li>7- Moderate</li> </ul>                                                                                                                     |
| E6  | What is the texture requirement of the food you eat?       | <ul style="list-style-type: none"> <li>1- Hard</li> <li>2- Moderate</li> <li>3- Soft</li> </ul>                                                                                                                                                                                              |
| E7  | What is the temperature requirement of the food you eat?   | <ul style="list-style-type: none"> <li>1- Hot</li> <li>2- Warm</li> <li>3- Cold</li> </ul>                                                                                                                                                                                                   |
| E8  | How fast do you usually eat?                               | <ul style="list-style-type: none"> <li>1- Slowly (&gt; 45min)</li> <li>2- Moderately</li> <li>3- Fast (&lt; 15min)</li> </ul>                                                                                                                                                                |
| E9  | Do you have a regular diet?                                | <ul style="list-style-type: none"> <li>1- Yes</li> <li>2- No (Jump to E11)</li> </ul>                                                                                                                                                                                                        |
| E10 | When is your mealtime?                                     | <ul style="list-style-type: none"> <li>1- Breakfast, _____(specific meal time)</li> <li>2- Lunch, _____(specific meal time)</li> <li>3- Dinner, _____(specific meal time)</li> <li>4- Extra meal 1, _____(specific meal time)</li> <li>5- Extra meal 2, _____(specific meal time)</li> </ul> |
| E11 | What is the average frequency of your breakfast each week? | <ul style="list-style-type: none"> <li>1- Home, _____(times)</li> <li>2- Restaurant, _____(times)</li> <li>3- Canteen, _____(times)</li> <li>4- Take-away, _____(times)</li> </ul>                                                                                                           |
| E12 | What is the average frequency of your lunch each week?     | <ul style="list-style-type: none"> <li>1- Home, _____(times)</li> <li>2- Restaurant, _____(times)</li> <li>3- Canteen, _____(times)</li> <li>4- Take-away, _____(times)</li> </ul>                                                                                                           |

|     |                                                                                       |                                                                                                                                                                                                                |
|-----|---------------------------------------------------------------------------------------|----------------------------------------------------------------------------------------------------------------------------------------------------------------------------------------------------------------|
| E13 | What is the average frequency of your lunch each week?                                | 1- Home, _____(times)<br>2- Restaurant, _____(times)<br>3- Canteen, _____(times)<br>4- Take-away, _____(times)                                                                                                 |
| E14 | What is the average frequency of your lunch each week?                                | 1- Home, _____(times)<br>2- Restaurant, _____(times)<br>3- Canteen, _____(times)<br>4- Take-away, _____(times)                                                                                                 |
| E15 | Please sort your meals according to food intake                                       | 1- Breakfast > Lunch > Dinner<br>2- Lunch > Breakfast > Dinner<br>3- Lunch > Dinner > Breakfast<br>4- Breakfast > Dinner > Lunch<br>5- Dinner > Lunch > Breakfast<br>6- Dinner > Breakfast > Lunch<br>7- Equal |
| E16 | How often do you eat sweets each week?                                                | 1- Almost not<br>2- Seldom (Once or twice a week)<br>3- Always (three to five times a week)<br>4- Daily (five or more times a week)                                                                            |
| E17 | How often do you eat fried food each week?                                            | 1- Almost not<br>2- Seldom (Once or twice a week)<br>3- Always (three to five times a week)<br>4- Daily (five or more times a week)                                                                            |
| E18 | How often do you drink tea each week?                                                 | 1- Almost not<br>2- Seldom (Once or twice a week)<br>3- Always (three to five times a week)<br>4- Daily (five or more times a week)                                                                            |
| E19 | How often do you drink coffee each week?                                              | 1- Almost not<br>2- Seldom (Once or twice a week)<br>3- Always (three to five times a week)<br>4- Daily (five or more times a week)                                                                            |
| E20 | In addition to your daily diet, do you regularly take vitamin or mineral supplements? | 1- Yes<br>2- Irregular<br>3- No                                                                                                                                                                                |
| E21 | In addition to your daily diet, do you regularly take probiotic supplements?          | 1- Yes<br>2- Irregular<br>3- No                                                                                                                                                                                |

---

|     |                                                                                                                                                            |                                 |
|-----|------------------------------------------------------------------------------------------------------------------------------------------------------------|---------------------------------|
| E22 | In addition to your daily diet, do you regularly take other nutritional supplements (e.g. melatonin/protein powder/dietary fiber/meal replacement powder)? | 1- Yes<br>2- Irregular<br>3- No |
|-----|------------------------------------------------------------------------------------------------------------------------------------------------------------|---------------------------------|

---



---

***Part 6: Psychological State***

---

| No. | Item | Response option | Your answer |
|-----|------|-----------------|-------------|
|-----|------|-----------------|-------------|

---

**F1-Questionnaire 1**

(Please answer all questions carefully. This questionnaire asks people to rate themselves and select the corresponding option according to different circumstances. The higher scores represented the more agreeable with the point of view)

---

|      |                                                |                                                                                    |
|------|------------------------------------------------|------------------------------------------------------------------------------------|
| F1-1 | In uncertain times, I usually expect the best. | 1- Strongly disagree<br>2- Disagree<br>3- Neutral<br>4- Agree<br>5- Strongly agree |
| F1-2 | If something can go wrong for me, it will.     | 1- Strongly disagree<br>2- Disagree<br>3- Neutral<br>4- Agree<br>5- Strongly agree |
| F1-3 | I always optimistic about my future.           | 1- Strongly disagree<br>2- Disagree<br>3- Neutral<br>4- Agree<br>5- Strongly agree |

---



|      |                                                                 |                                                                                    |
|------|-----------------------------------------------------------------|------------------------------------------------------------------------------------|
| F1-4 | Things never work out the way I want them to.                   | 1- Strongly disagree<br>2- Disagree<br>3- Neutral<br>4- Agree<br>5- Strongly agree |
| F1-5 | I rarely count on good things happening to me.                  | 1- Strongly disagree<br>2- Disagree<br>3- Neutral<br>4- Agree<br>5- Strongly agree |
| F1-6 | In general, I prefer good things to bad things to happen to me. | 1- Strongly disagree<br>2- Disagree<br>3- Neutral<br>4- Agree<br>5- Strongly agree |

### **F2-Questionnaire 2**

(Please answer all questions carefully. This questionnaire asks people to rate themselves and select the corresponding option according to different circumstances. The higher scores represented the more agreeable with the point of view)

|      |                                            |                                                                                                                                                    |
|------|--------------------------------------------|----------------------------------------------------------------------------------------------------------------------------------------------------|
| F2-1 | In most ways my life is close to my ideal. | 1- Strongly disagree<br>2- Disagree<br>3- Slightly disagree<br>4- Neither agree nor disagree<br>5- Slightly agree<br>6- Agree<br>7- Strongly agree |
| F2-2 | The conditions of my life are excellent.   | 1- Strongly disagree<br>2- Disagree<br>3- Slightly disagree<br>4- Neither agree nor disagree<br>5- Slightly agree<br>6- Agree<br>7- Strongly agree |
| F2-3 | I am satisfied with my life.               | 1- Strongly disagree<br>2- Disagree<br>3- Slightly disagree<br>4- Neither agree nor disagree<br>5- Slightly agree                                  |

|      |                                                              |                                                                                                                                                    |
|------|--------------------------------------------------------------|----------------------------------------------------------------------------------------------------------------------------------------------------|
|      |                                                              | 6- Agree<br>7- Strongly agree                                                                                                                      |
| F2-4 | So far I have gotten the important things I want in life.    | 1- Strongly disagree<br>2- Disagree<br>3- Slightly disagree<br>4- Neither agree nor disagree<br>5- Slightly agree<br>6- Agree<br>7- Strongly agree |
| F2-5 | If I could live my life over, I would change almost nothing. | 1- Strongly disagree<br>2- Disagree<br>3- Slightly disagree<br>4- Neither agree nor disagree<br>5- Slightly agree<br>6- Agree<br>7- Strongly agree |

### F3-UCLA Loneliness Scale (Simplified Version)

(Please read each section carefully. Larger number means higher frequency of occurrence.  
This questionnaire asks people to rate themselves and select the corresponding option according to different circumstances)

|      |                           |                                       |
|------|---------------------------|---------------------------------------|
| F3-1 | Lack companionship        | 1- Never<br>2- Sometimes<br>3- Always |
| F3-2 | Feel left out             | 1- Never<br>2- Sometimes<br>3- Always |
| F3-3 | Feel isolated from others | 1- Never<br>2- Sometimes<br>3- Always |

### F4-Generalized Anxiety Disorder 7-item Scale (GAD7)

(Over the last 2 weeks, how often have you been bothered by any of the following problems?)

|      |                                      |                                                                                |
|------|--------------------------------------|--------------------------------------------------------------------------------|
| F4-1 | Feeling nervous, anxious, or on edge | 1- Not at all<br>2- Several days<br>3- More than 1 week<br>4- Nearly every day |
|------|--------------------------------------|--------------------------------------------------------------------------------|

|      |                                                   |                                                                                |
|------|---------------------------------------------------|--------------------------------------------------------------------------------|
| F4-2 | Feeling hard to stop or control anxiety           | 1- Not at all<br>2- Several days<br>3- More than 1 week<br>4- Nearly every day |
| F4-3 | Excessive anxiety about different things          | 1- Not at all<br>2- Several days<br>3- More than 1 week<br>4- Nearly every day |
| F4-4 | Trouble relaxing                                  | 1- Not at all<br>2- Several days<br>3- More than 1 week<br>4- Nearly every day |
| F4-5 | Being so restless that it is hard to sit still    | 1- Not at all<br>2- Several days<br>3- More than 1 week<br>4- Nearly every day |
| F4-6 | Becoming easily annoyed or irritable              | 1- Not at all<br>2- Several days<br>3- More than 1 week<br>4- Nearly every day |
| F4-7 | Feeling afraid as if something awful might happen | 1- Not at all<br>2- Several days<br>3- More than 1 week<br>4- Nearly every day |

**F5-Patient Health Questionnaire-9 (PHQ-9)**

(Over the last 2 weeks, how often have you been bothered by any of the following problems?)

|      |                                                         |                                                                                       |
|------|---------------------------------------------------------|---------------------------------------------------------------------------------------|
| F5-1 | Little interest or pleasure in doing things             | 1- Not at all<br>2- Several days<br>3- More than half the days<br>4- Nearly every day |
| F5-2 | Feeling down, depressed, or hopeless                    | 1- Not at all<br>2- Several days<br>3- More than half the days<br>4- Nearly every day |
| F5-3 | Trouble falling or staying asleep, or sleeping too much | 1- Not at all<br>2- Several days<br>3- More than half the days<br>4- Nearly every day |

|      |                                                                                                                                                                        |                                                                                       |
|------|------------------------------------------------------------------------------------------------------------------------------------------------------------------------|---------------------------------------------------------------------------------------|
| F5-4 | Feeling tired or having little energy                                                                                                                                  | 1- Not at all<br>2- Several days<br>3- More than half the days<br>4- Nearly every day |
| F5-5 | Poor appetite or overeating                                                                                                                                            | 1- Not at all<br>2- Several days<br>3- More than half the days<br>4- Nearly every day |
| F5-6 | Feeling bad about yourself or that you are a failure or have let yourself or your family down                                                                          | 1- Not at all<br>2- Several days<br>3- More than half the days<br>4- Nearly every day |
| F5-7 | Trouble concentrating on things, such as reading the newspaper or watching television                                                                                  | 1- Not at all<br>2- Several days<br>3- More than half the days<br>4- Nearly every day |
| F5-8 | Moving or speaking so slowly that other people could have noticed; Or the opposite—being so fidgety or restless that you have been moving around a lot more than usual | 1- Not at all<br>2- Several days<br>3- More than half the days<br>4- Nearly every day |
| F5-9 | Thoughts that you would be better off dead or of hurting yourself in some way                                                                                          | 1- Not at all<br>2- Several days<br>3- More than half the days<br>4- Nearly every day |
